# Supplementary material for: A miniDOAS instrument optimised for ammonia field-measurements
Source: Copernicus journal article supplement (doi:10.5194/amt-2015-360), 2016-01-19
Supplement: Supplementary file 1 [file amt-2015-360-supplement.pdf]

## Supplement

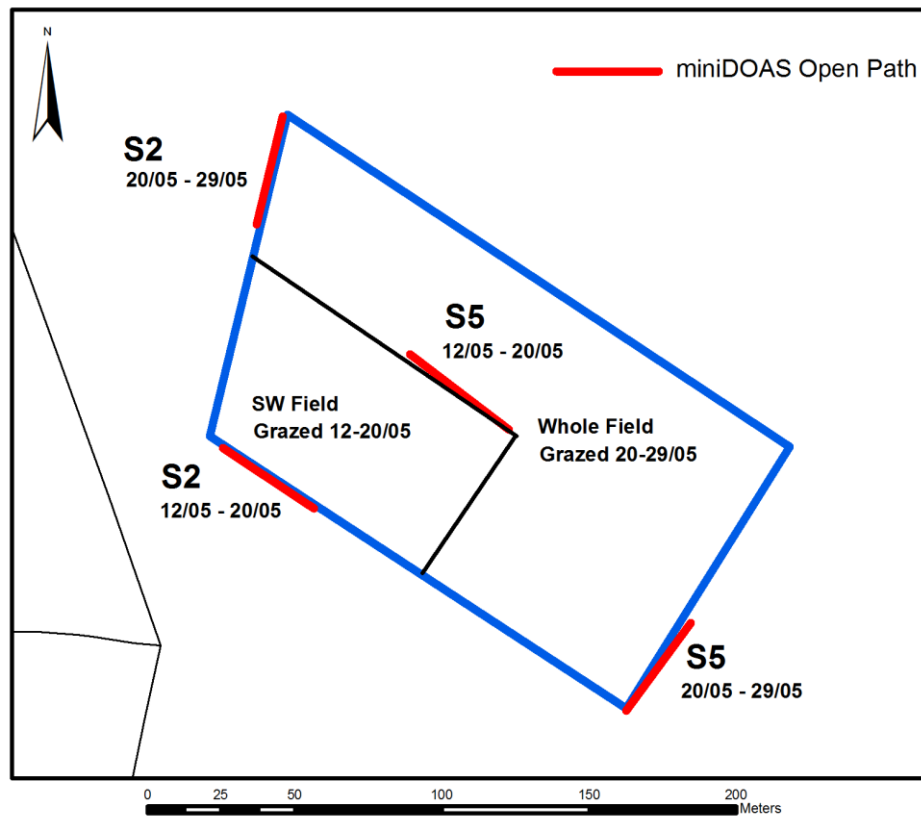

Figure S1: Outline experiment R2.

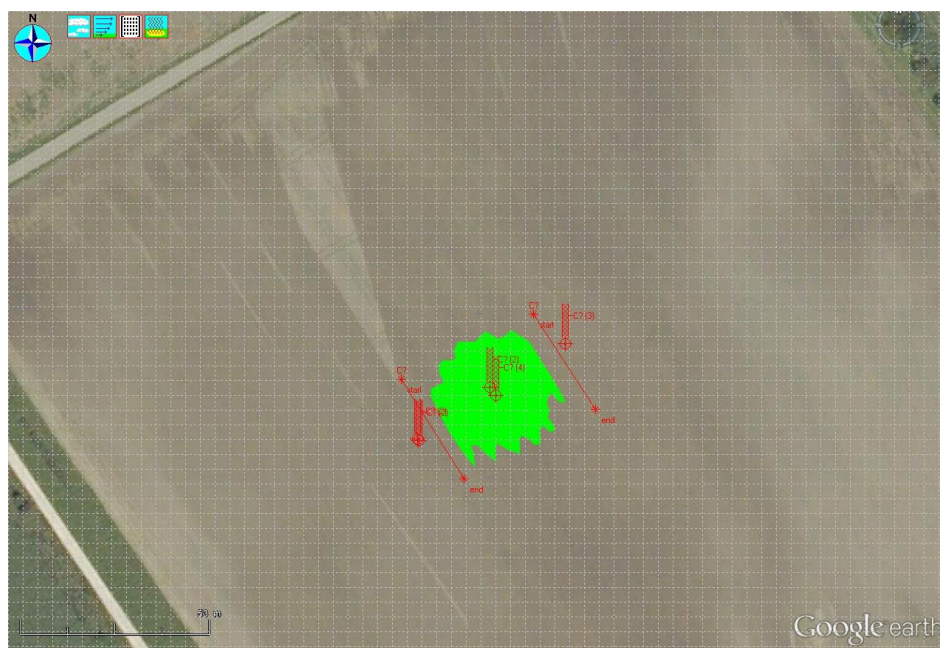

Figure S2: Overview over experiment W2; green = emission area, red lines = miniDOAS, red tower symbols = impingers.

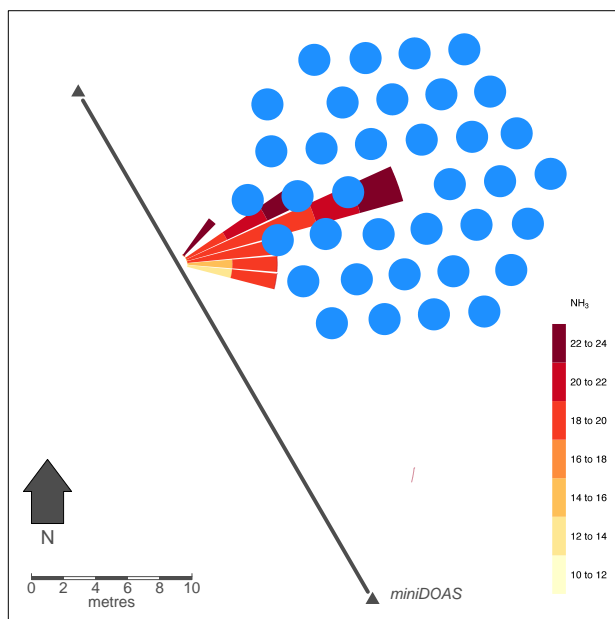

Figure S3: Setup and gradients from artificial gas release experiment W4.

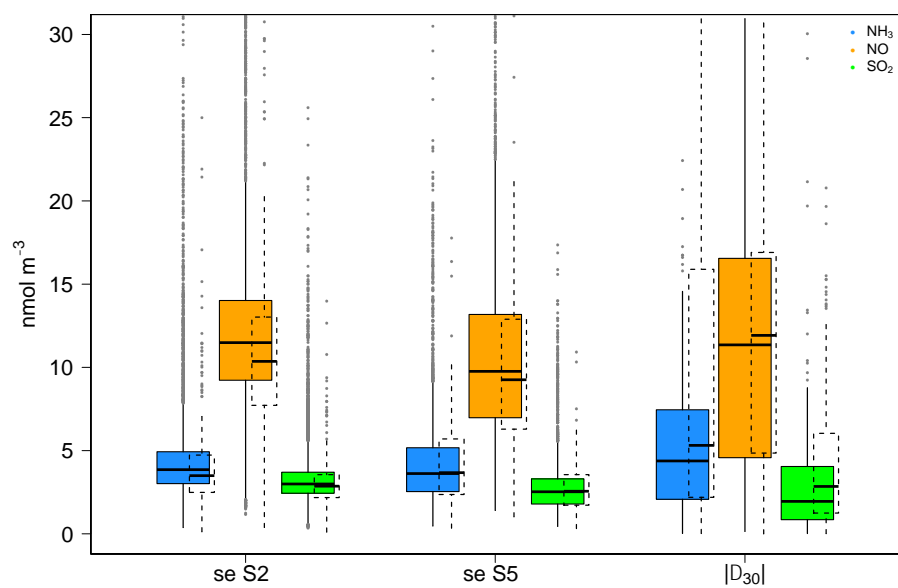

Figure S4: Concentration standard errors for all three gases; ranges of concentration standard errors (1 min spectra) obtained from the R1 inter-comparison experiment (Table 1), including the concentration differences between instrument S2 and S5 for half hourly means ( $|D_{30}| = |S2 - S5|$ ) of the individual 1 min values; in addition, the respective ranges for 30 min averaged spectra are shown (dashed boxplots).

Table S1: Using calibration cuvettes to test two miniDOAS systems (S2 and S5) for NH<sub>3</sub>-NO-SO<sub>2</sub> cross interference; both tests were performed indoors over path lengths of 21.4 and 31.4 m for S2 and S5, respectively; se = concentration calculation standard error, concentrations are given in ug m<sup>-3</sup>.

| miniDOAS | cuvette         | NH <sub>3</sub> | NH <sub>3</sub> se | SO <sub>2</sub> | SO <sub>2</sub> se | NO    | NO se |
|----------|-----------------|-----------------|--------------------|-----------------|--------------------|-------|-------|
| S2       | N <sub>2</sub>  | 0.07            | 0.03               | 0.04            | 0.11               | 0.12  | 0.18  |
| S2       | NH <sub>3</sub> | 645             | 5.9                | -0.09           | 20.8               | -15.8 | 13.6  |
| S2       | NO              | 21.6            | 5.1                | -13.1           | 20.2               | 2031  | 33.8  |
| S2       | SO <sub>2</sub> | 0.5             | 0.8                | 239             | 3.7                | -8.4  | 4.6   |
| S5       | N <sub>2</sub>  | 0.08            | 0.04               | 0.21            | 0.12               | -0.02 | 0.18  |
| S5       | NH <sub>3</sub> | 446             | 0.6                | -0.8            | 1.9                | -4.3  | 2.6   |
| S5       | NO              | -1.5            | 0.6                | 0.5             | 2.8                | 1346  | 3.3   |
| S5       | SO <sub>2</sub> | -1.5            | 0.5                | 173.3           | 0.9                | -25.8 | 1.8   |
